# Supplementary material
Source: PubMed Central journal article supplement (PMC3087617)
Supplement: NIHMS238216-supplement-1.pdf [file NIHMS238216-supplement-1.pdf]

# GRLD-1 regulates cell-wide abundance of glutamate receptor through post-transcriptional regulation

George J. Wang, Lijun Kang, Julie E. Kim, Géraldine S. Maro, X. Z. Shawn Xu & Kang Shen

## Supplementary Figure-1 Shen

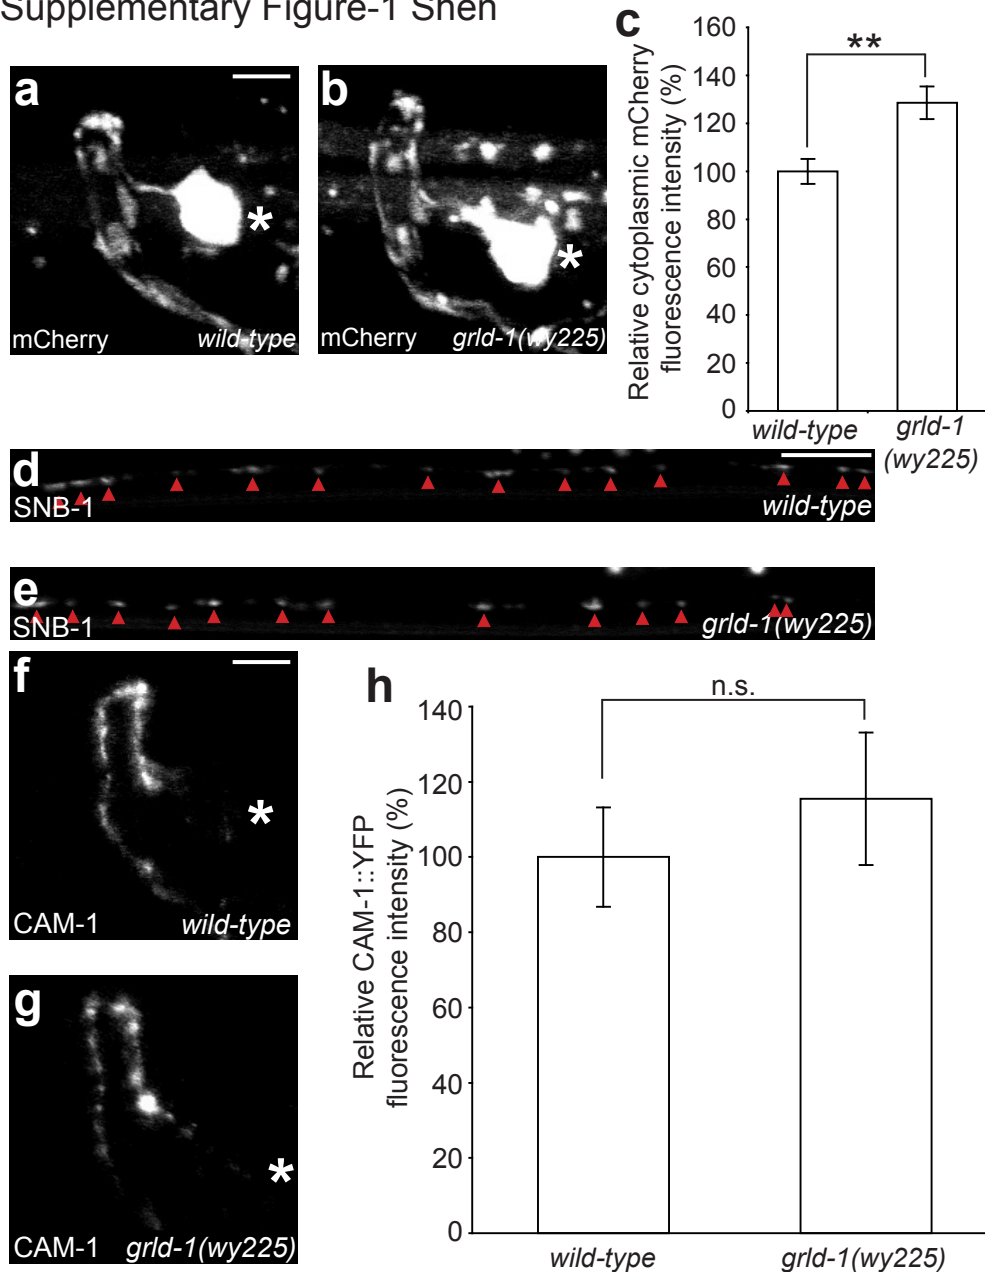

**Supplementary Figure 1** Cytoplasmic mCherry, SNB-1::CFP, and CAM-1::YFP are not mislocalized or reduced in *grld-1(wy225)*. **(a, b)** Representative L2-stage wild-type **(a)** and *grld-1(wy225)* **(b)** animals expressing cytoplasmic mCherry. Asterisk denotes the AVE cell body. Scale bar, 2  $\mu$ m. **(c)** Comparison of cytoplasmic mCherry fluorescence intensity (normalized to wild-type) between wild-type and *grld-1* mutants.  $n = 35$ . Error bars, s.e.m.  $**P < 0.01$ ,  $t$ -test. **(d, e)** Representative L2 stage wild-type **(d)** and *grld-1(wy225)* **(e)** animals expressing SNB-1::YFP. Same region as dashed box in **Figure 1a**. Triangles denote SNB-1::CFP puncta. Scale bar, 2  $\mu$ m. **(f, g)** Representative L2 wild-type **(f)** and *grld-1(wy225)* **(g)** animals expressing CAM-1::YFP. Scale bar, 2  $\mu$ m. Asterisk denotes the AVE cell body. **(h)** Comparison of CAM-1::YFP fluorescence intensity (normalized to wild-type) between wild-type and *grld-1* mutants.  $n = 20$ . Error bars, s.e.m. n.s. = not significant, compared to wild-type animals,  $t$ -test.

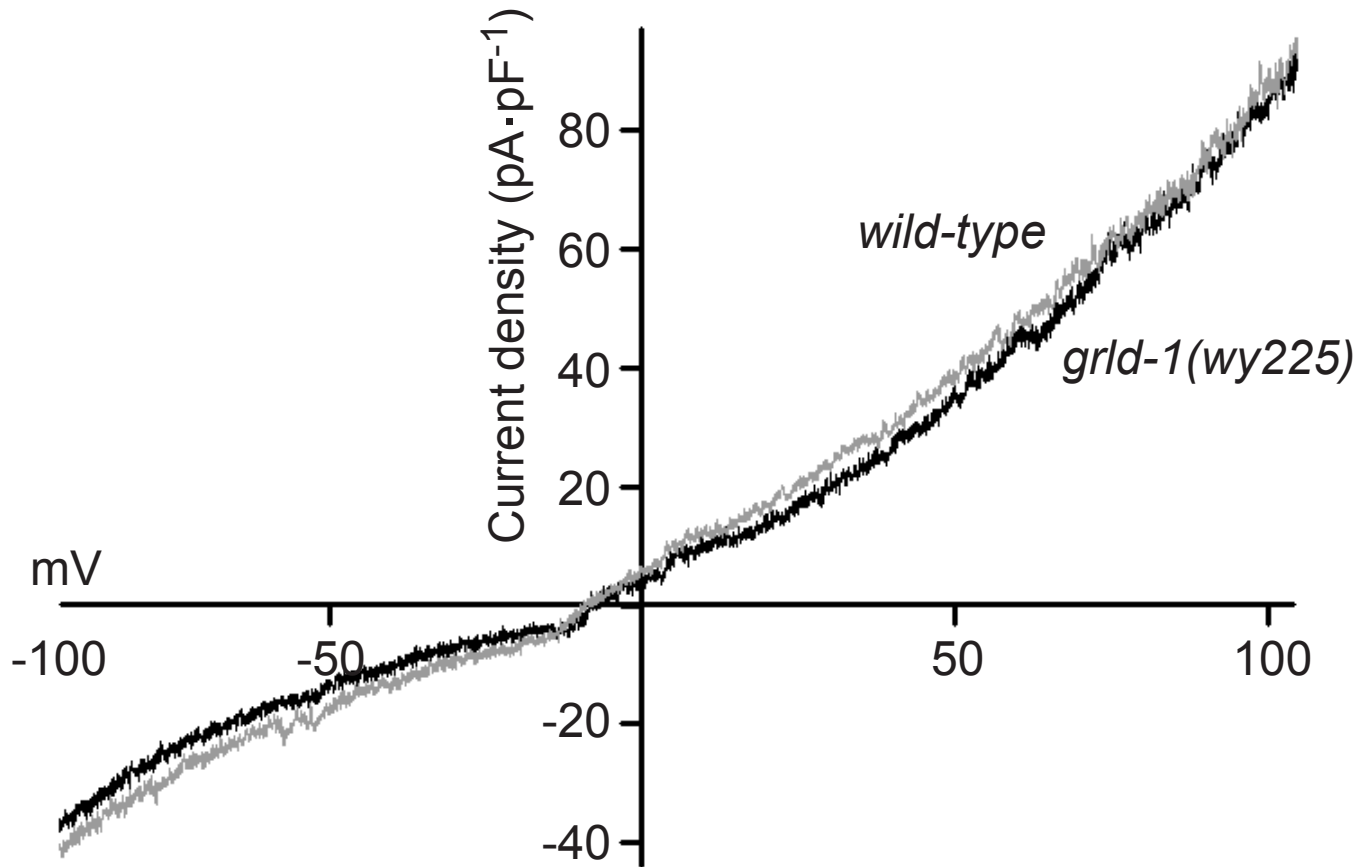

**Supplementary Figure 2** Voltage-dependent currents are similar in wild-type and *grld-1(wy225)* mutants. Gray, wild-type AVEs; Black, *grld-1(wy225)* mutant AVEs.

Supplementary Figure-3 Shen

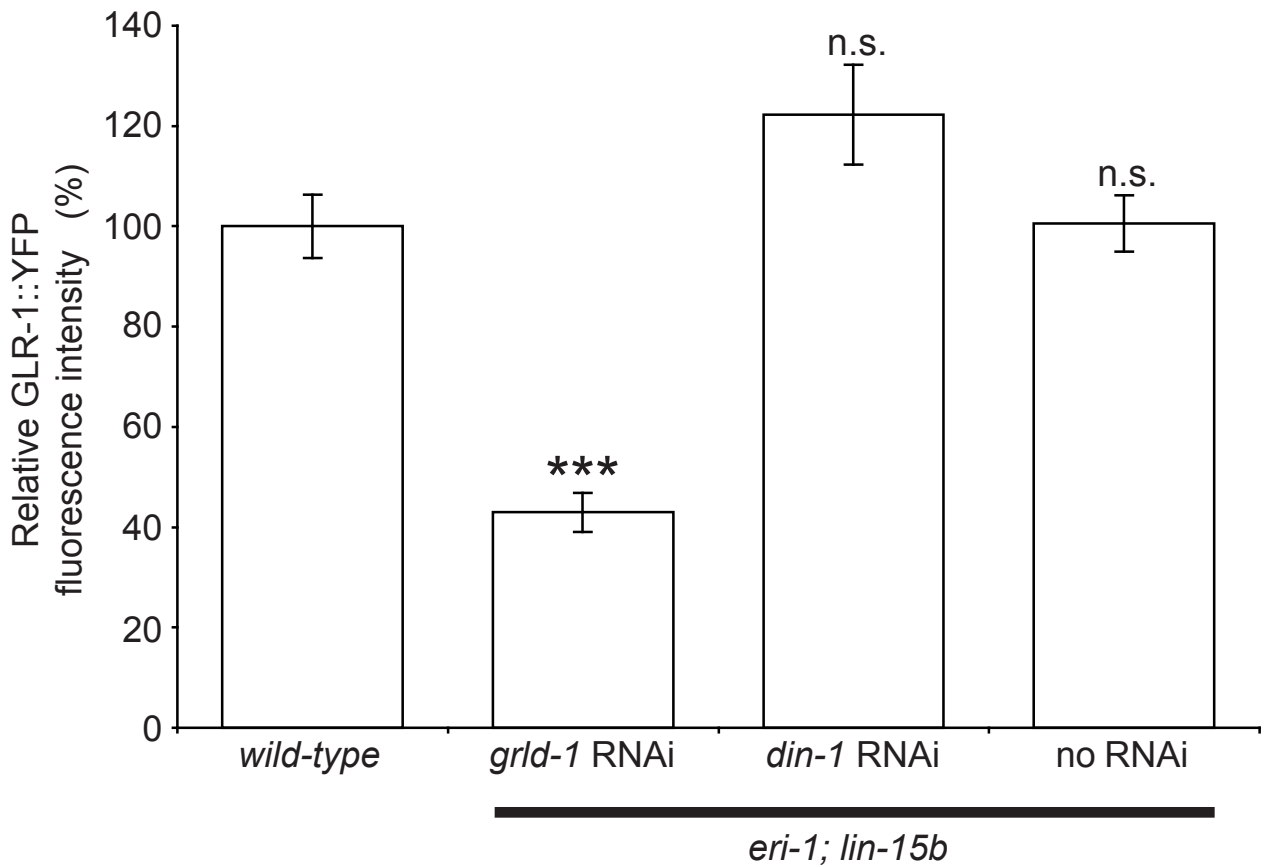

**Supplementary Figure 3** *grd-1* RNAi exhibits decreased levels of GLR-1 in AVE. Comparison of GLR-1::YFP fluorescence intensity (normalized to wild-type) between wild-type, *eri-1(mg366); lin-15b(n765)* RNAi of *grd-1*, *eri-1(mg366); lin-15b(n765)* RNAi of *din-1*, and *eri-1(mg366); lin-15b(n765)* no RNAi worms. n = 23. Error bars, s.e.m. \*\*\*P < 0.001, n.s. = not significant, *t*-test.

## Supplementary Figure-4 Shen

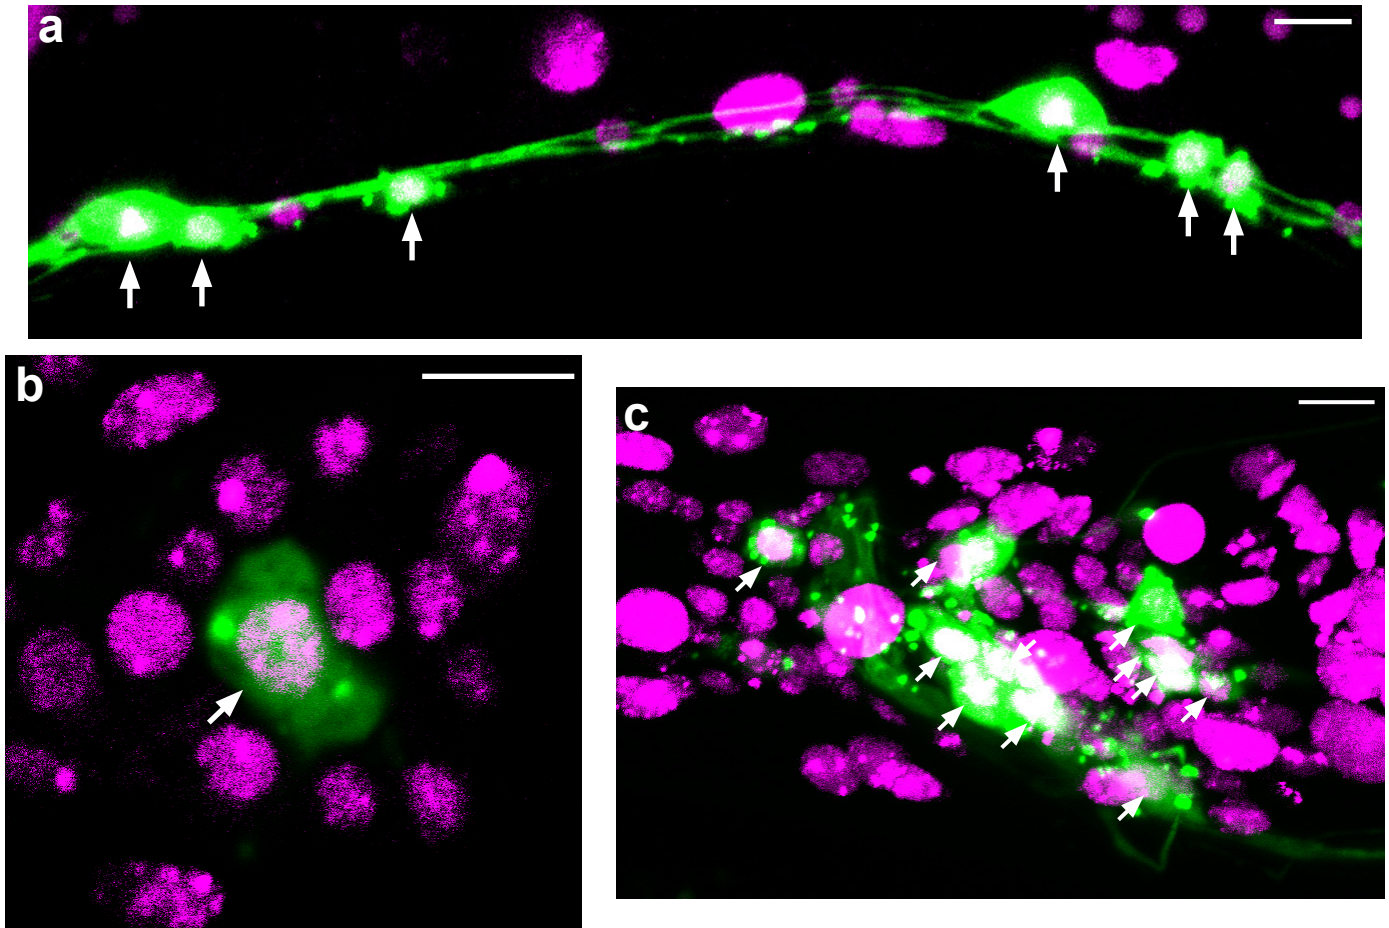

**Supplementary Figure 4** *grld-1* is expressed in many other neurons. (a) *grld-1* is expressed in A-type motor neurons. NLS::mCherry (pseudo-colored green) is expressed in A-type motor neurons by the *unc-4* promoter and GFP-tagged GRLD-1 (pseudo-colored magenta) is expressed with fosmid recombineering. Arrows indicate cell bodies from left to right: DA3, VA4, VC2, VA5, DA4, and VC3. The image is a confocal stack of a young-adult worm. Scale bar, 5  $\mu$ m. (b) *grld-1* is expressed in ASH. NLS::mCherry (pseudo-colored green) is expressed in ASH by the *sra-6* promoter and GFP-tagged GRLD-1 (pseudo-colored magenta) is expressed with fosmid recombineering. The arrow indicates the ASH cell body and anterior is left. The image is a single confocal plane ( $\sim$ 1  $\mu$ m) of an L2-staged worm. Scale bar, 5  $\mu$ m. (c) *grld-1* is expressed in many *glr-1* expressing neurons. NLS::mCherry (pseudo-colored green) is expressed by the *glr-1* promoter and GFP-tagged GRLD-1 (pseudo-colored magenta) is expressed with fosmid recombineering. Arrows indicate cell bodies of *glr-1*-expressing neurons with expression of GFP-tagged GRLD-1. The image is a confocal stack of an L4-staged worm. Scale bar, 5  $\mu$ m.

Supplementary Figure-5 Shen

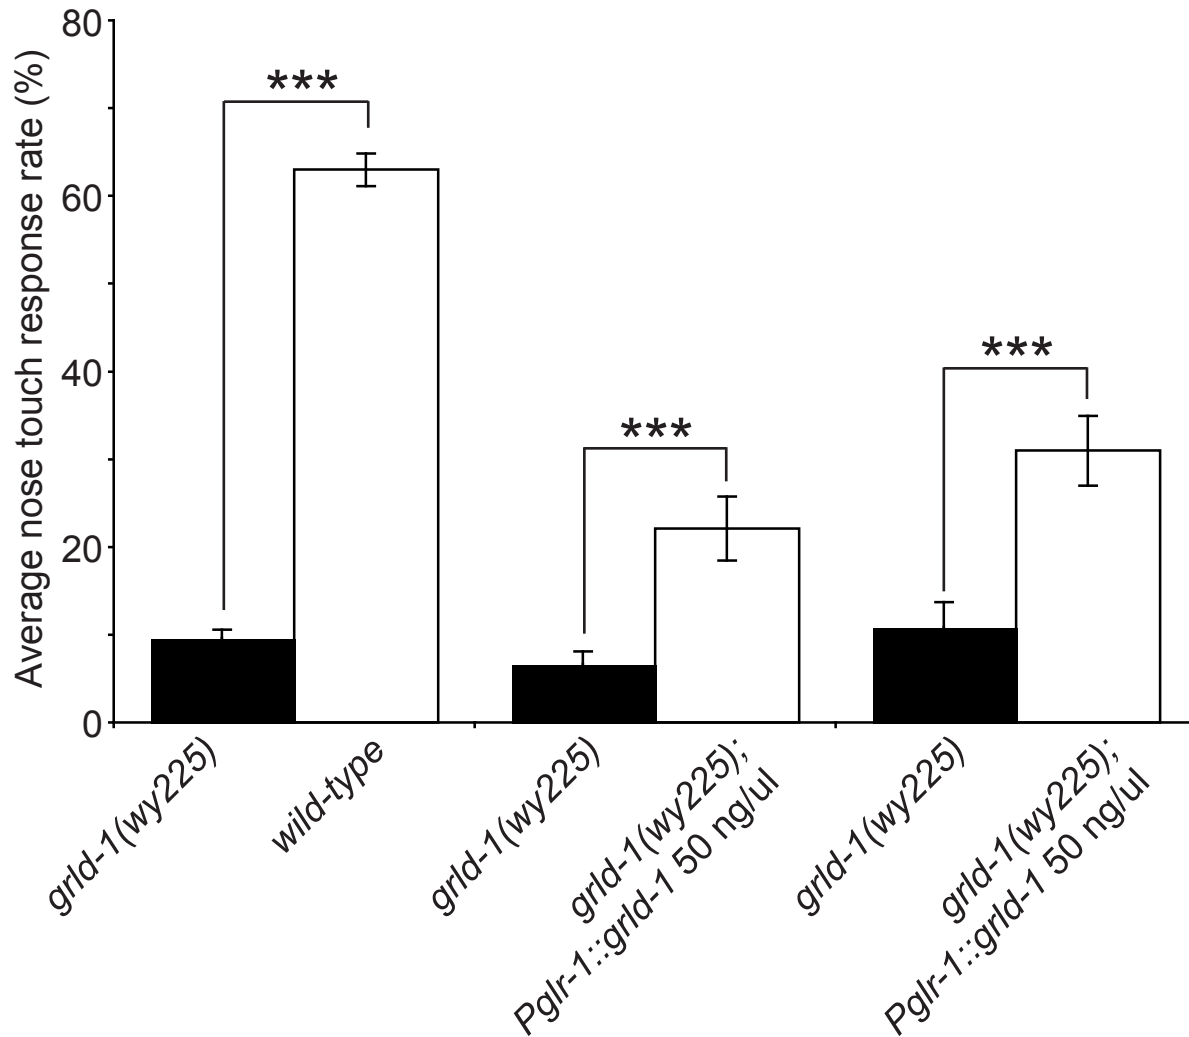

**Supplementary Figure 5** Comparison of nose-touch behavioural response between wild-type, *grid-1(wy225)*, and *grid-1(wy225)* expressing *grid-1* under the *glr-1* promoter animals. The compared genotypes were assayed on the same set of days. Wild-type compared to *grid-1(wy225)* mutants: n = 177, other comparisons: n = 24. Error bars, s.e.m. \*\*\*P < 0.001, t-test.

## Supplementary Figure-6 Shen

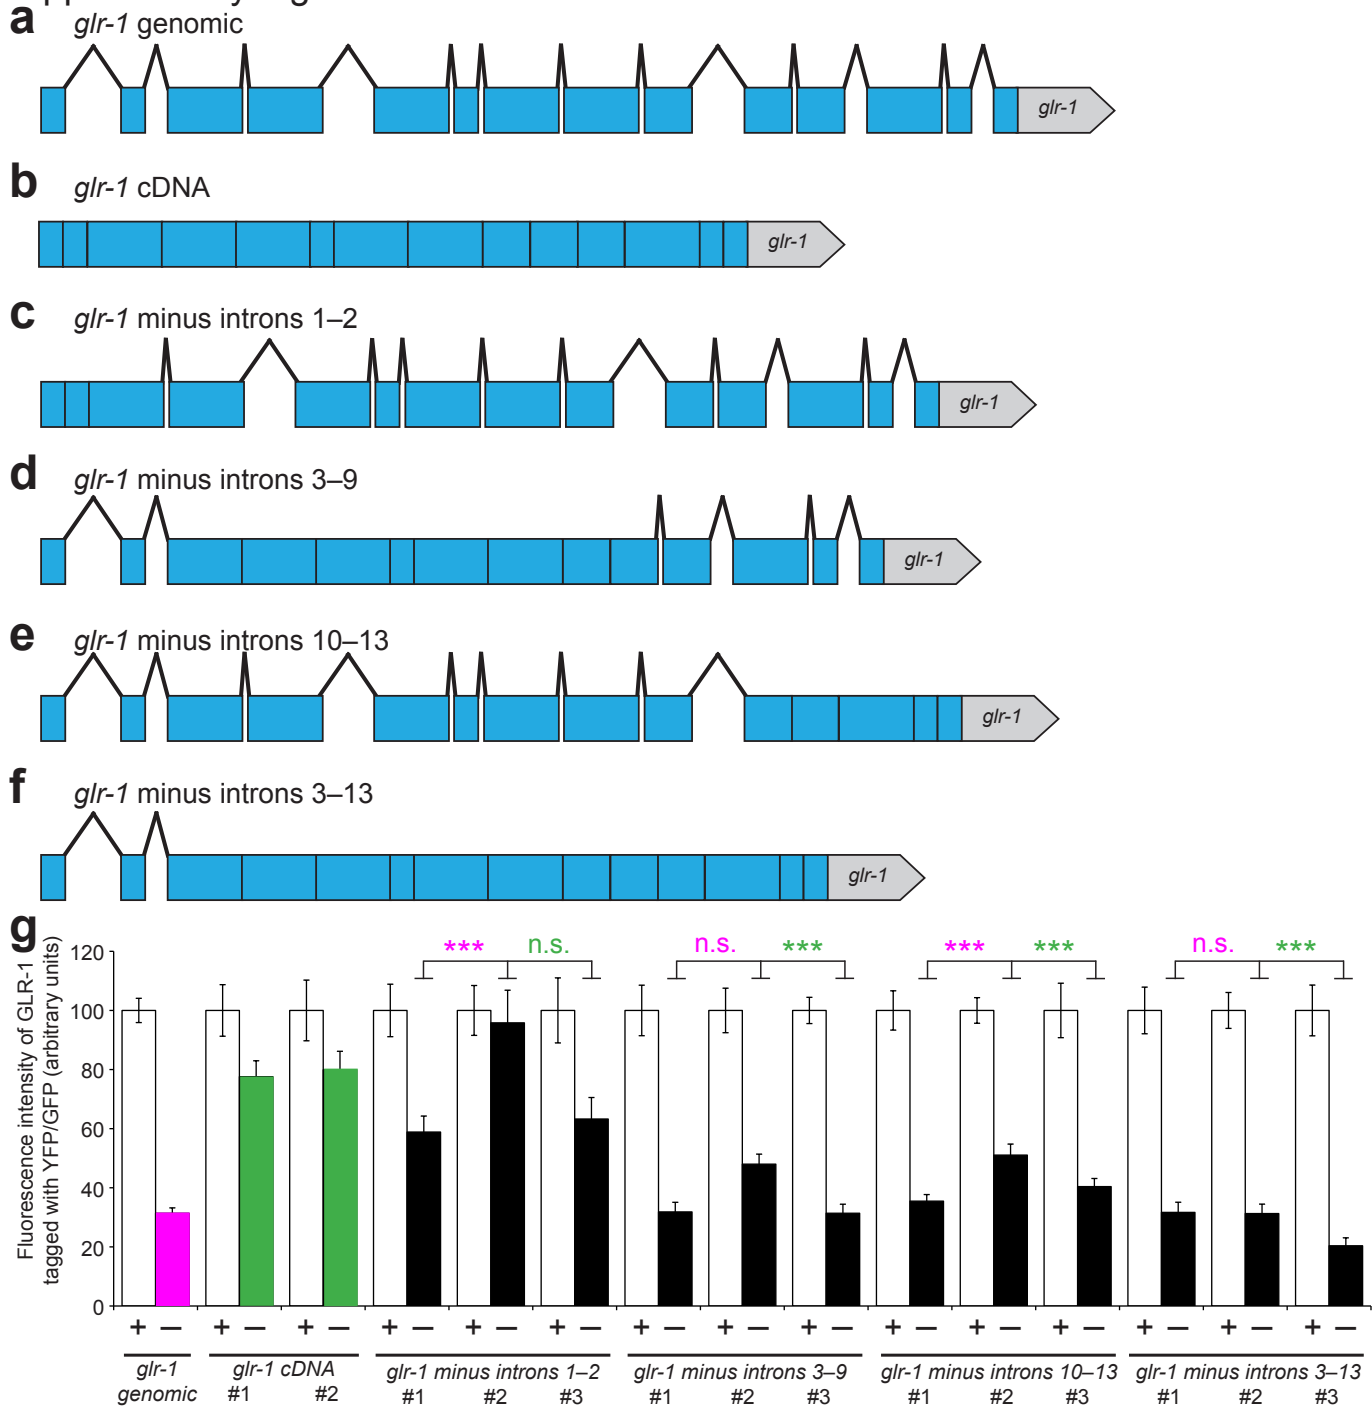

**Supplementary Figure 6** *grld-1* regulates *glr-1* through introns 1–2. (a–f) Schematic cartoon of the *glr-1* constructs. Lines, introns; blue boxes, exons; pentagons, 3' UTR. Note this *glr-1* depiction consists all of the introns and exons. *glr-1* genomic::*glr-1* 3' UTR: all endogenous exons, introns, and 3' UTR. All constructs have YFP or GFP inserted in the last exon (a). *glr-1* cDNA::*glr-1* 3' UTR: all endogenous exons, no introns, and with *glr-1* 3' UTR (b). *glr-1* genomic (minus introns 1–2)::*glr-1* 3' UTR: all endogenous exons, introns 3–13, and with *glr-1* 3' UTR (c). *glr-1* genomic (minus introns 3–9)::*glr-1* 3' UTR: all endogenous exons, introns 1–2 and 10–13, and with *glr-1* 3' UTR (d). *glr-1* genomic (minus introns 10–13)::*glr-1* 3' UTR: all endogenous exons, introns 1–9, and with *glr-1* 3' UTR (e). *glr-1* genomic (minus introns 3–13)::*glr-1* 3' UTR: all endogenous exons, introns 1–2, and with *glr-1* 3' UTR (f). (g) Effectiveness of the *glr-1* constructs in rescuing the GLR-1 fluorescent phenotypes. The *grld-1*(*wy225*) intensities were normalized to their respective expression constructs. #1, #2, and #3 indicate different extra-chromosomal arrays for each construct.  $n \geq 20$ . + is wildtype and – is *grld-1*(*wy225*). For each *glr-1* genomic-cDNA hybrid construct, the three arrays in *grld-1*(*wy225*) mutants are normalized and averaged together, then compared to *grld-1*(*wy225*) mutants expressing the *glr-1* genomic construct (in purple) and the averaged *glr-1* cDNA constructs (in green). Error bars, s.e.m. \*\*\* $P < 0.001$ , n.s. = not significant, *t*-test.

## Supplementary List of Constructs

### Constructs and Transgenic Strains

Expression clones were made in the pSM vector, a derivative of pPD49.26 from A. Fire (Stanford University) with extra cloning sites from C. I. Bargmann (Rockefeller University).

*Popt-3* was amplified using the following primers: 5'

GGCCGGCCTAACAGAATTAGTAAGAAGGTGGG, 3'

GGCGCGCCCAGACACGGGAGAGGCGG and subcloned into the pSM vector using FseI and AscI. *Popt-3* was subsequently moved to other vectors with SphI (upstream of FseI in pSM) and XmaI (downstream of AscI in pSM) unless otherwise noted.

The *Popt-3* pSM vector was converted to Gateway destination vectors by inserting the Gateway reading frame A into NheI, KpnI sites.

All expression vectors were made with cDNA unless noted.

*wyls120: Popt-3::glr-1 genomic::YFP::glr-1 3' UTR* (GW58-2) at 25 ng/ul: *Popt-3* promoter was cloned into KP#196 (J. Kaplan) using NotI, Sall restriction sites to generate *Popt-3::glr-1::GFP::glr-1 3' UTR* (GW31-1). We added SphI and XmaI restriction sites between *Popt-3* promoter sequence and NotI, Sall sites to increase compatibility with Shen lab pSM vectors. The following primers were used to amplify *Popt-3* sequence: 5'

GAAAGGGCGGCCGCATGctaacagaattagtaagaaggtggg, 3'

GAAAGGGTCGACCCGGGcagacacgggagaggcgg. Furthermore, GFP was replaced by YFP to generate *Popt-3::glr-1::YFP::glr-1 3' UTR*. *Popt-3::snb-1::CFP::unc-54 3' UTR* (JK6-1) at 5 ng/ul: *snb-1* was cloned into *Pttx-3::CFP::unc-54 3' UTR*<sup>1</sup> using NheI and KpnI. *Popt-3::mCherry::unc-54 3' UTR* (GW90-1) at 1 ng/ul: The GFP from pPD95.79 from A. Fire (Stanford University) was cut with KpnI and EcoRI (blunted with mung bean nuclease) and replaced with mCherry from (GW38-3) cut with KpnI and SacII (blunted with mung bean

nuclease). The mCherry from GW38-3 was generated via PCR from J. We (University of California, San Diego) with the following primers: 5' gaaaggGGTACCgATGgatccATGGTCTCAAAGG, 3' GAAAGGccgcggttaCTTATAACAATTCATCCATGCCACCTG. The array was integrated into chromosome I using trimethylpsoralen/UV mutagenesis.

*wyEx2438: Popt-3::mCherry::unc-54 3' UTR* (GW90-2) at 0.5 ng/ul: cloned as above in *wyIs120*.

*wyEx3504: fosmid WRM0615bA06 w/ grld-1 C-terminal GFP* (GW238-3) at 1 ng/ul: *GFP* (and a linker) was amplified using the following primers: 5' attgccattcttgetcggagctcttgcctccgggctctggaactccaGGTAGTGGAAGCGGCTCTatgagtaaaggag aagaacttttactgg, 3' gagaataaattgtataaatcgagttattacaagctcttggatggagatcctattgtatagttcatccatgcatgtg from pBALU-1<sup>2</sup>, the PCR product was recombineered<sup>2</sup>, into fosmid WRM0615bA06 C-terminal of *grld-1* replacing the stop codon. *Popt-3::mCherry::unc-54 3' UTR* (GW90-2) at 2 ng/ul: cloned as above in *wyIs120*.

*wyEx3557: fosmid WRM0615bA06 w/ grld-1 C-terminal GFP* (GW238-3) at 1 ng/ul: cloned as above in *wyEx3504*. *Punc-4::NLS::mCherry::unc-54 3' UTR* (MS74-2) at 20 ng/ul: *NLS::mCherry* was amplified using the following primers: 5' (containing NLS sequence) ggggtaccatgCCAAAGAAGAAGCGTAAGGTAGTCTCAAAGGGTGAAGAAGAT, 3' ggaattcTTAggatccactagtCTTATAACAATTCATCCATGCC and subcloned into pSM using KpnI and EcoRI. *Punc-4* was amplified using the following primers: 5' ACATGCATGCctgcagcctctgaaaatatatcaatgc, 3' TTTTTTGGCGCGCCtttactttttggaagaagaatcc and subcloned using SphI and AscI.

*wyEx3559: fosmid WRM0615bA06 w/ grld-1 C-terminal GFP* (GW238-3) at 1 ng/ul: cloned as above in *wyEx3504*. *Psra-6::NLS::mCherry::unc-54 3' UTR* (GW244-1) at 20 ng/ul:



*NLS::mCherry::unc-54 3' UTR* from MS74-2 was subcloned into a pSM derivative with *Psra-6*<sup>3</sup> using *NheI* and *ApaI*.

*wyEx3561: fosmid WRM0615bA06 w/ grld-1 C-terminal GFP* (GW238-3) at 1 ng/ul: cloned as above in *wyEx3504. Pglr-1::NLS::mCherry::unc-54 3' UTR* (GW245-1) at 10 ng/ul: *Pglr-1* was amplified using the following primers: 5'

GAAAGGGCGGCCCGCCCCGGGCTGCAGCATTTTTTAAAAG, 3'

GAAAGGTCTAGATGTGAATGTGTCAGATTGGGTGCC and subcloned into a pSM derivative using *NotI* and *XbaI* and then subcloned into MS74-2 using *SphI* and *XbaI*.

*wyEx1669: Popt-3::GRLD-1::unc-10 3' UTR* (GW130-1) at 50 ng/ul: *unc-10 3' UTR* was amplified from *GFP::rab-3a::unc-10 3' UTR* (M. Nonet) using the following primers: 5'

CGGAATTCCGGCCGCGGATAACAAATTCATATG, 3'

CGCGGGCCCACTAGTTGGCGTTAATATTTAAATG and subcloned into pSM using *EcoRI* and *ApaI*. The *grld-1* entry clone was obtained from the ORFeome project

(<http://worfdb.dfci.harvard.edu/>) and cloned into the destination vector *Popt-3::gateway::unc-10 3' UTR* (GW68) using the Gateway strategy with LR clonase (Invitrogen) to make *Popt-3::grld-1::unc-10 3' UTR*. Injection were made into *wyIs120; grld-1(wy225)*.

*wyEx2366: Popt-3::GRLD-1::unc-10 3' UTR* (GW130-1) as *wyEx1669* at 20 ng/ul. Co-injection marker: *Podr-1::RFP* at 40 ng/ul injected into *grld-1(wy225)*.

*wyEx2354: Pglr-1::grld-1::unc-10 3' UTR* (GW169-2) at 50 ng/ul: *Pglr-1* was amplified using the following primers: 5' GAAAGGGCGGCCCGCCCCGGGCTGCAGCATTTTTTAAAAG 3' GAAAGGTCTAGATGTGAATGTGTCAGATTGGGTGCC and subcloned into GW130 using *NotI* and *XbaI*.

*wyEx2355* is a different isolate from the same injection as *wyEX2354*.

*wyEx3614: Popt-3::grld-1::unc-10 3' UTR (GW130-2) as wyEx1669 at 50 ng/ul. Popt-3::mCherry::unc-54 3' UTR (GW90-1) as wyIs120 at 2 ng/ul. Co-injection marker: Punc-122::RFP at 40 ng/ul. Injection was made into wyIs120; wy225 and wyIs120 was subsequently outcrossed for described experiments.*

*wyEx2661: Pnmr-1::GRLD-1::unc-10 3' UTR (GW191-1) at 50 ng/ul: Pnmr-1 was amplified using the following primers: 5' gaaagggcatcggactgattgcaaccttgaccattcatg, 3' gaaaggggcgcccatctgtaacaaaactaaagttgtcgtgtcc and subcloned into pSM using SphI and AscI, then subcloned into GW58 using SphI and XmaI and then subcloned into GW130 using AscI and NotI.*

*wyEx2031: Popt-3::GRLD-1<sub>1-375</sub> RRM only::unc-10 (GW147-1) at 30 ng/ul: RRM*s were amplified from the *grld-1* entry clone (see *wyEX1669*) using the following primers: 5' atggcagaagaacggtagacctc, 3' ttaagtagccgataggcctcctccagc and was cloned into the pCR8/GW/TOPO/ TA vector (Invitrogen, GW144). Subsequently, the *RRMs* were cloned into the destination vector *Popt-3::gateway::unc-10 3' UTR (GW126)* using the Gateway strategy with LR clonase (Invitrogen). Injections were made into *wyIs120; grld-1(wy225)*.

*wyEx2048: Popt-3::GRLD-1<sub>322-521</sub> SPOC only::unc-10 3' UTR (GW148-1) at 30 ng/ul: SPOC* was amplified from the *grld-1* entry clone (see *wyEX1669*) using the following primers: 5' atgtacgccaagattgacggcgcaacc, 3' ttatggagttccaggagcccggagc and was subcloned into the pCR8/GW/TOPO/ TA vector (Invitrogen, GW145). Subsequently, the *SPOC* was cloned into the destination vector *Popt-3::gateway::unc-10 3' UTR (GW126)* using the Gateway strategy with LR clonase (Invitrogen). Injections were made into *wyIs120; grld-1(wy225)*.

*wyEx1704: Popt-3::glr-1 genomic::YFP::unc-10 3' UTR (GW137-14) at 25 ng/ul : glr-1 genomic::YFP* was amplified from GW58 (see *wyIs120*) using the following primers: 5' gaaagggcggtcagacagctgtgttagagagtgttg, 3' gaaaggggcgccctcgacgtcgccggcaccacatctga and

was subcloned into *Popt-3::gateway::YFP::unc-10 3' UTR* (GW17-3) with AscI and SacII. Injections were made into *grld-1(wy225)*.

*wyEx1707* is a different isolate from the same injection as *wyEx1704*.

*wyEx2357: Popt-3::glr-1 cDNA::GFP::glr-1 3' UTR* (GW174-1) at 20 ng/ul: this construct was made created using the KP#196 (J. Kaplan) backbone. The *glr-1* cDNA was obtained from the ORFeome project (<http://worfdb.dfci.harvard.edu/>). Nucleotide errors were corrected by swapping out fragments of *glr-1* from KP#196 and a cDNA library generated using standard protocols. First the middle region of the *glr-1 cDNA::GFP* was subcloned into KP#196 to generate GW167 using NheI and XhoI. The 3' region of the *glr-1 cDNA::GFP* was then inserted into GW167 with the XhoI fragment from KP#196 (J. Kaplan) using XhoI to make GW168. Finally the 5' region of *glr-1* cDNA was generated with the following primers:

GWp200: 5' gtcgacgtcgccggcacccaatctgacacattcacaatgtttctctgtttctt, GWp201: 3'

gctagcagttcactaattggaggtctcac and was subcloned into GW168-4 with NheI and Sall. The GFP was inserted into the *glr-1* cDNA using HindIII from KP#196. *Popt-3* was cloned as in *wyIs120*.

*Popt-3::mCherry::unc-54 3' UTR* (GW90-2) at 1 ng/ul was generated as in *wyIs120*.

*wyEx2359* is a different isolate from the same injection as *wyEx2357*.

*wyEx1655: Popt-3::GFP::GRLD-1::unc-54 3' UTR* (GW128-1) at 1 ng/ul: the *grld-1* entry clone was obtained from the ORFeome project (<http://worfdb.dfci.harvard.edu/>) and cloned into the destination vector *Popt-3::GFP::gateway::unc-54 3' UTR* (GW75-8) using the Gateway strategy with LR clonase (Invitrogen).

*wyEx2505: Phsp16-2, hsp16-41::grld-1a::unc-54 3' UTR* (GW188-2) at 50 ng/ul: We subcloned *grld-1a* cDNA into the plasmid pPD49.83, which contains inducible heat-shock promoters *hsp16-2* and *hsp16-41*. Injections were made into *wyIS120; grld-1(wy225)*.

*wyEx1245: Popt-3::cam-1::YFP::unc-10 3' UTR* (GW101-1) at 10 ng/ul: The *cam-1* entry clone was obtained from the ORFeome project (<http://worfdb.dfci.harvard.edu/>) and cloned into the destination vector *Popt-3::gateway::YFP::unc-10 3' UTR* (GW17-2B) using the Gateway strategy with LR clonase (Invitrogen). *Popt-3::snb-1::CFP::unc-54 3' UTR* (JK6-1) at 5 ng/ul: described above in *wyIS120*. Injections were made into *glo-1(zu391)* from the CGC and was subsequently outcrossed into N2.

*wyEx4035: Popt-3::glr-1 genomic (minus introns 1-2)::GFP::glr-1 3' UTR* (GW261-1) at 22ng/ul: *glr-1 genomic (minus introns 1-2)* was created by cloning BamHI, NheI from GW174 (see *wyEx2357*) into BamHI, NheI of GW31 (see *wyIS120*). *Popt-3::mCherry::unc-54 3' UTR* (GW90-1) at 1 ng/ul was generated as in *wyIs120*. Injections were made into *grld-1(wy225)*.

*wyEx4036: Popt-3::glr-1 genomic (minus introns 1-2)::GFP::glr-1 3' UTR* (GW261-1) at 22ng/ul: *glr-1 genomic (minus introns 1-2)* was created by cloning BamHI, NheI from GW174 (see *wyEx2357*) into BamHI, NheI of GW31 (see *wyIS120*). *Popt-3::mCherry::unc-54 3' UTR* (GW90-1) at 1 ng/ul was generated as in *wyIs120*.

*wyEx4034: Popt-3::glr-1 genomic (minus introns 1-2)::GFP::glr-1 3' UTR* (GW261-1) at 22ng/ul: *glr-1 genomic (minus introns 1-2)* was created by cloning BamHI, NheI from GW174 (see *wyEx2357*) into BamHI, NheI of GW31 (see *wyIS120*). *Popt-3::mCherry::unc-54 3' UTR* (GW90-1) at 1 ng/ul was generated as in *wyIs120*. This was a different injection than *wyEx4036*.

*wyEx4037: Popt-3::glr-1 genomic (minus introns 3-9)::GFP::glr-1 3' UTR* (GW262-1) at 21ng/ul: *glr-1 genomic (minus introns 3-9)* was created by cloning NheI, BstAPI from GW174 (see *wyEx2357*) into NheI, BstAPI of GW31 (see *wyIS120*). *Popt-3::mCherry::unc-54 3' UTR* (GW90-1) at 1 ng/ul was generated as in *wyIs120*. Injections were made into *grld-1(wy225)*.

*wyEx4038: Popt-3::glr-1 genomic (minus introns 3-9)::GFP::glr-1 3' UTR* (GW262-1) at 21ng/ul: *glr-1 genomic (minus introns 3-9)* was created by cloning NheI, BstAPI from GW174

(see *wyEx2357*) into *NheI*, *BstAPI* of GW31 (see *wyIS120*). *Popt-3::mCherry::unc-54 3' UTR* (GW90-1) at 1 ng/ul was generated as in *wyIs120*.

*wyEx4039* is a different isolate from the same injection as *wyEx4038*.

*wyEx4040: Popt-3::glr-1 genomic (minus introns 10-13)::GFP::glr-1 3' UTR* (GW262-1) at 21ng/ul: *glr-1 genomic (minus introns 10-13)* was created by cloning *BstAPI*, *KpnI* from GW174 (see *wyEx2357*) into *BstAPI*, *KpnI* of GW31 (see *wyIS120*). *Popt-3::mCherry::unc-54 3' UTR* (GW90-1) at 1 ng/ul was generated as in *wyIs120*. Injections were made into *grld-1(wy225)*.

*wyEx4041* is a different isolate from the same injection as *wyEx4040*.

*wyEx4042: Popt-3::glr-1 genomic (minus introns 10-13)::GFP::glr-1 3' UTR* (GW262-1) at 21ng/ul: *glr-1 genomic (minus introns 10-13)* was created by cloning *BstAPI*, *KpnI* from GW174 (see *wyEx2357*) into *BstAPI*, *KpnI* of GW31 (see *wyIS120*). *Popt-3::mCherry::unc-54 3' UTR* (GW90-1) at 1 ng/ul was generated as in *wyIs120*.

*wyEx4043: Popt-3::glr-1 genomic (minus introns 3-13)::GFP::glr-1 3' UTR* (GW262-1) at 21ng/ul: *glr-1 genomic (minus introns 3-13)* was created by cloning *BamHI*, *NheI* from GW31 (see *wyIS120*) into *BamHI*, *NheI* of GW174 (see *wyEx2357*). *Popt-3::mCherry::unc-54 3' UTR* (GW90-1) at 1 ng/ul was generated as in *wyIs120*.

*wyEx4044* and *wyEx4045* is a different isolate from the same injection as *wyEx4043*.

## References

1. Colon-Ramos, D.A., Margeta, M.A. & Shen, K. Glia promote local synaptogenesis through UNC-6 (netrin) signaling in *C. elegans*. *Science* **318**, 103-106 (2007).
2. Tursun, B., Cochella, L., Carrera, I. & Hobert, O. A toolkit and robust pipeline for the generation of fosmid-based reporter genes in *C. elegans*. *PLoS One* **4**, e4625 (2009).
3. Shen, K. & Bargmann, C.I. The immunoglobulin superfamily protein SYG-1 determines the location of specific synapses in *C. elegans*. *Cell* **112**, 619-630 (2003).
